# Supplementary material for: Rotherkopfite, KNa2(Fe2+2.5Ti4+1.5)Fe2+(Si4O12)2, a new neptunite-group mineral without essential lithium, from Rother Kopf, Eifel volcanic fields, Germany
Source: Copernicus journal article supplement (doi:10.5194/ejm-36-605-2024), 2024-08-19
Supplement: Supplementary file [file ejm-36-605-2024-supplement-title-page.pdf › ejm-36-605-2024-supplement-title-page.pdf]

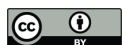

*Supplement of*

**Rotherkopfite,  $\text{KNa}_2(\text{Fe}_{2.5}^{2+}\text{Ti}_{1.5}^{4+})\text{Fe}^{2+}(\text{Si}_4\text{O}_{12})_2$ , a new neptunite-group mineral without essential lithium, from Rother Kopf, Eifel volcanic fields, Germany**

**Anthony R. Kampf et al.**

*Correspondence to:* Anthony R. Kampf (akampf@nhm.org)

- ejm-36-605-2024-supplement-title-page.pdf
- ROTHERKOPFITE.cif

The copyright of individual parts of the supplement might differ from the article licence.
